# Supplementary material for: Methyl-donor supplementation in obese mice prevents the progression of NAFLD, activates AMPK and decreases acyl-carnitine levels
Source: PubMed Central journal article supplement — Mol Metab. 2014 May 20;3(5):565–80. doi: 10.1016/j.molmet.2014.04.010 (PMC4099513; doi:10.1016/j.molmet.2014.04.010), 2014-05-20
Supplement: mmc1.pdf [file mmc1.pdf]

## SUPPLEMENTARY MATERIAL

### Methyl-donor supplementation in obese mice prevents the progression of NAFLD, activates AMPK and decreases acyl-carnitine levels<sup>a</sup>

Christoph Dahlhoff <sup>1,2</sup>, Stefanie Worsch <sup>3</sup>, Manuela Sailer <sup>1</sup>, Björn A. Hummel <sup>4,5</sup>, Jarlei Fiamoncini <sup>1</sup>, Kirsten Uebel <sup>3</sup>, Rima Obeid <sup>4</sup>, Christian Scherling <sup>1</sup>, Jürgen Geisel <sup>4</sup>, Bernhard L. Bader <sup>2,3,\*</sup>, Hannelore Daniel <sup>1</sup>

<sup>a</sup>Bernhard L. Bader and Hannelore Daniel contributed equally to this work

## SUPPLEMENTAL FIGURES

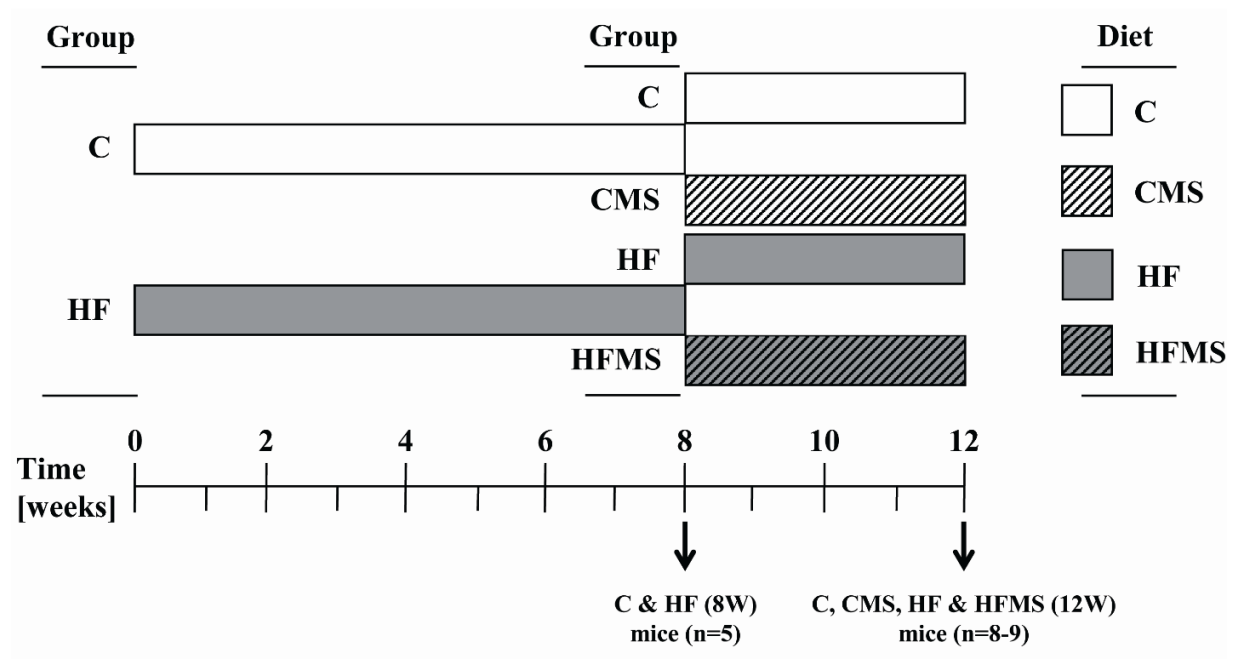

**Figure S1:** Experimental design of the MDS feeding trial. Open and gray boxes represent feeding of control (C) and high-fat (HF) diet, respectively, and open-lined and gray-lined boxes represent methyl-donor supplemented control (CMS) and methyl-donor supplemented high-fat (HFMS) dietary feeding, respectively. C and HF mice sacrificed after 8 weeks are depicted as 8W, and C, CMS, HF and HFMS mice sacrificed after 12 weeks are depicted as 12W.

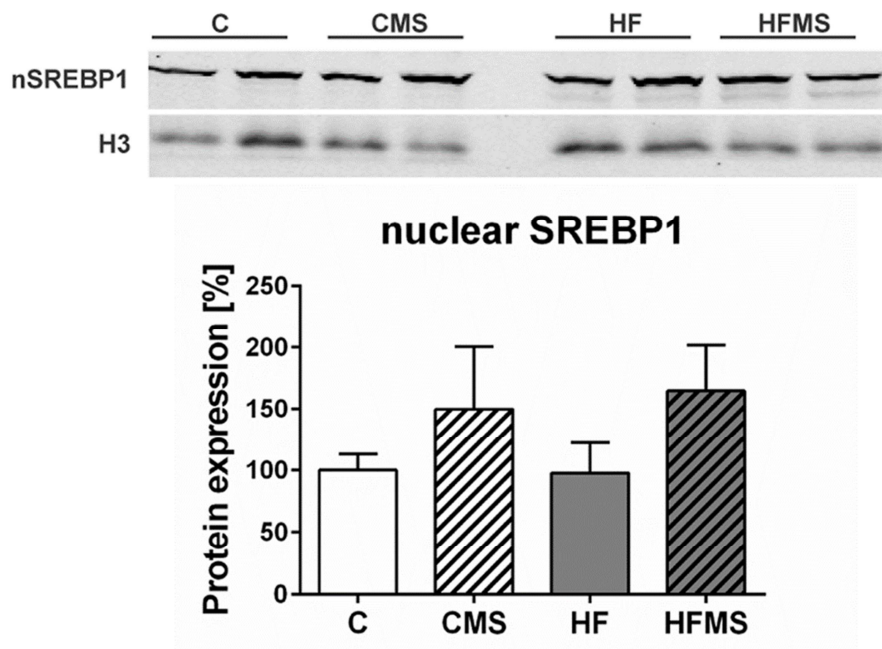

**Figure S2:** Western blot analysis of hepatic nSREBP1 after 4 weeks of MDS. Data are presented as mean  $\pm$  SEM (n=4-9). Open and gray columns represent control (C) and high-fat (HF) dietary feeding, respectively, and open-lined and gray-lined columns represent methyl-donor supplemented control (CMS) and methyl-donor supplemented high-fat (HFMS) dietary feeding, respectively. nSREBP1, nuclear sterol regulatory element-binding protein-1; H3, histone 3.

**SUPPLEMENTAL TABLES**

| <b>Table S1</b>           | C    | CMS  | HF   | HFMS |
|---------------------------|------|------|------|------|
| Dry matter                | 952  | 952  | 971  | 971  |
| Crude protein             | 208  | 208  | 241  | 241  |
| Crude fat                 | 42   | 42   | 340  | 340  |
| Butter fat                | -    | -    | -    | -    |
| Beef tallow               | -    | -    | 310  | 310  |
| Soybean oil               | 40   | 40   | 30   | 30   |
| Coconut fat               | -    | -    | -    | -    |
| Cocoa butter              | -    | -    | -    | -    |
| Crude fiber               | 50   | 50   | 60   | 60   |
| Crude ash                 | 56   | 56   | 61   | 61   |
| Starch                    | 468  | 468  | 22   | 22   |
| Sugar/dextrine            | 108  | 108  | 224  | 224  |
| N-free extracts           | 594  | 594  | 270  | 270  |
| GE [MJ/kg]                | 18   | 18   | 25.2 | 25.2 |
| ME [MJ/kg]                | 15   | 15   | 21.4 | 21.4 |
| % carbohydrate            | 66   | 66   | 21   | 21   |
| % protein                 | 23   | 23   | 19   | 19   |
| % fat                     | 11   | 11   | 60   | 60   |
| <b><i>Amino acids</i></b> |      |      |      |      |
| Lysine                    | 17.1 | 17.1 | 19.8 | 19.8 |
| Methionine                | 7.3  | 14.8 | 8.3  | 15.8 |

**Table S1**  
**Continued**

|                          | C         | CMS       | HF        | HFMS      |
|--------------------------|-----------|-----------|-----------|-----------|
| Cystine                  | 0.9       | 0.9       | 4.6       | 4.6       |
| Met+Cys                  | 8.2       | 15.7      | 12.8      | 20.3      |
| Threonine                | 9.3       | 9.3       | 10.7      | 10.7      |
| Tryptophan               | 2.7       | 2.7       | 3.1       | 3.1       |
| Arginine                 | 7.6       | 7.6       | 8.8       | 8.8       |
| Histidine                | 6.6       | 6.6       | 7.6       | 7.6       |
| Valine                   | 14.2      | 14.2      | 16.4      | 16.4      |
| Isoleucine               | 10.9      | 10.9      | 12.5      | 12.5      |
| Leucine                  | 20.5      | 20.5      | 23.6      | 23.6      |
| Phenylalanine            | 11.1      | 11.1      | 12.9      | 12.9      |
| Phe+Tyr                  | 22.2      | 22.2      | 25.7      | 25.7      |
| Glycine                  | 4.3       | 4.3       | 5.0       | 5.0       |
| Glutamic acid            | 46.9      | 46.9      | 54.1      | 54.1      |
| Aspartic acid            | 15.5      | 15.5      | 17.9      | 17.9      |
| Proline                  | 23.9      | 23.9      | 27.6      | 27.6      |
| Alanine                  | 6.8       | 6.8       | 7.9       | 7.9       |
| Serine                   | 12.4      | 12.4      | 14.3      | 14.3      |
| <b><i>Vitamins</i></b>   |           |           |           |           |
| Vitamin A                | 15000 IU  | 15000 IU  | 15000 IU  | 15000 IU  |
| Vitamin D3               | 1500 IU   | 1500 IU   | 1500 IU   | 1500 IU   |
| Vitamin E                | 150 mg/kg | 150 mg/kg | 150 mg/kg | 150 mg/kg |
| Vitamin K (as menadione) | 20 mg/kg  | 20 mg/kg  | 20 mg/kg  | 20 mg/kg  |
| Vitamin C                | 30 mg/kg  | 30 mg/kg  | 30 mg/kg  | 30 mg/kg  |

**Table S1**  
**Continued**

|                              | C          | CMS        | HF         | HFMS       |
|------------------------------|------------|------------|------------|------------|
| Thiamin (B1)                 | 16 mg/kg   | 16 mg/kg   | 16 mg/kg   | 16 mg/kg   |
| Riboflavin (B2)              | 16 mg/kg   | 16 mg/kg   | 16 mg/kg   | 16 mg/kg   |
| Pyridoxine (B6)              | 18 mg/kg   | 18 mg/kg   | 18 mg/kg   | 18 mg/kg   |
| Cobalamin (B12)              | 30 µg/kg   | 1530 µg/kg | 30 µg/kg   | 1530 µg/kg |
| Nicotinic acid               | 49 mg/kg   | 49 mg/kg   | 45 mg/kg   | 45 mg/kg   |
| Pantothenic acid             | 56 mg/kg   | 56 mg/kg   | 55 mg/kg   | 55 mg/kg   |
| Folic acid                   | 19 mg/kg   | 34 mg/kg   | 19 mg/kg   | 34 mg/kg   |
| Biotin                       | 310 µg/kg  | 310 µg/kg  | 310 µg/kg  | 310 µg/kg  |
| Choline chloride             | 1.04 g/kg  | 16.04 g/kg | 2.3 g/kg   | 17.3 g/kg  |
| Inositol                     | 80 mg/kg   | 80 mg/kg   | 80 mg/kg   | 80 mg/kg   |
| Betaine                      | -          | 15 g/kg    | -          | 15 g/kg    |
| <b><i>Trace elements</i></b> |            |            |            |            |
| Iron                         | 166 mg/kg  | 166 mg/kg  | 139 mg/kg  | 139 mg/kg  |
| Manganese                    | 98 mg/kg   | 98 mg/kg   | 82 mg/kg   | 82 mg/kg   |
| Zinc                         | 65 mg/kg   | 65 mg/kg   | 56 mg/kg   | 56 mg/kg   |
| Zinc sulfate                 | -          | 150 mg/kg  | -          | 150 mg/kg  |
| Copper                       | 14 mg/kg   | 14 mg/kg   | 12 mg/kg   | 12 mg/kg   |
| Iodine                       | 1.2 mg/kg  | 1.2 mg/kg  | 0.97 mg/kg | 0.97 mg/kg |
| Selenium                     | 0.14 mg/kg | 0.14 mg/kg | 0.13 mg/kg | 0.13 mg/kg |
| Cobalt                       | 0.15 mg/kg | 0.15 mg/kg | 0.13 mg/kg | 0.13 mg/kg |

**Table S1**  
**Continued**

|                                       | C    | CMS | HF    | HFMS |
|---------------------------------------|------|-----|-------|------|
| <b><i>Fatty acids [% in diet]</i></b> |      |     |       |      |
| C12:0                                 | -    |     | 0.03  |      |
| C14:0                                 | 0.02 |     | 1.03  |      |
| C16:0                                 | 0.45 |     | 8.06  |      |
| C17:0                                 | -    |     | 0.38  |      |
| C18:0                                 | 0.19 |     | 5.61  |      |
| C20:0                                 | 0.02 |     | 0.04  |      |
| C16:1                                 | 0.02 |     | 0.78  |      |
| C18:1                                 | 1.07 |     | 12.13 |      |
| C20:1                                 | -    |     | 0.01  |      |
| C18:2                                 | 2.12 |     | 2.37  |      |
| C18:3                                 | 0.26 |     | 0.33  |      |
| C20:4                                 | -    |     | 0.07  |      |

**Table S1:** Compositions of experimental diets.

Nutrient composition is expressed as [g/kg], except it is delineated differently.

| <b>Table S2</b>                     | C                         | HF                        |
|-------------------------------------|---------------------------|---------------------------|
| Food intake [g]                     | 225.4 ± 1.6 <sup>a</sup>  | 196.6 ± 2.9 <sup>b</sup>  |
| Energy intake [MJ]                  | 3.38 ± 0.02 <sup>a</sup>  | 4.21 ± 0.06 <sup>b</sup>  |
| Methionine intake [g]               | 1.65 ± 0.01               | 1.62 ± 0.03               |
| Cystine intake [g]                  | 0.20 ± 0.001 <sup>a</sup> | 0.90 ± 0.001 <sup>b</sup> |
| Choline chloride intake [g]         | 0.23 ± 0.002 <sup>a</sup> | 0.45 ± 0.007 <sup>b</sup> |
| Folate intake [mg]                  | 4.28 ± 0.03 <sup>a</sup>  | 3.74 ± 0.05 <sup>b</sup>  |
| Vitamin B <sub>12</sub> intake [µg] | 6.76 ± 0.05 <sup>a</sup>  | 5.90 ± 0.09 <sup>b</sup>  |
| Vitamin B <sub>6</sub> intake [mg]  | 4.06 ± 0.03 <sup>a</sup>  | 3.54 ± 0.05 <sup>b</sup>  |

**Table S2:** Total nutrient and energy intake in the C and HF group after the 8-weeks feeding period (DIO-phase).

Data are presented as mean ± SEM (n=8-9). Different superscript letters indicate statistical significance ( $p < 0.05$ ).

| <b>Table S3</b>                     | C                         | CMS                        | HF                       | HFMS                       |
|-------------------------------------|---------------------------|----------------------------|--------------------------|----------------------------|
| Food intake [g]                     | 343.7 ± 4.0 <sup>a</sup>  | 343.0 ± 4.1 <sup>a</sup>   | 283.0 ± 3.2 <sup>b</sup> | 282.6 ± 5.6 <sup>b</sup>   |
| Energy intake [MJ]                  | 5.16 ± 0.06 <sup>a</sup>  | 5.15 ± 0.06 <sup>a</sup>   | 6.06 ± 0.07 <sup>b</sup> | 6.05 ± 0.12 <sup>b</sup>   |
| Methionine intake [g]               | 2.51 ± 0.03 <sup>a</sup>  | 5.08 ± 0.06 <sup>b</sup>   | 2.35 ± 0.03 <sup>c</sup> | 4.47 ± 0.09 <sup>d</sup>   |
| Cystine intake [g]                  | 0.31 ± 0.004 <sup>a</sup> | 0.31 ± 0.004 <sup>a</sup>  | 1.30 ± 0.01 <sup>b</sup> | 1.30 ± 0.03 <sup>b</sup>   |
| Choline chloride intake [g]         | 0.36 ± 0.004 <sup>a</sup> | 5.50 ± 0.07 <sup>b</sup>   | 0.65 ± 0.01 <sup>c</sup> | 4.89 ± 0.10 <sup>d</sup>   |
| Folate intake [mg]                  | 6.53 ± 0.08 <sup>a</sup>  | 11.66 ± 0.14 <sup>b</sup>  | 5.38 ± 0.06 <sup>c</sup> | 9.61 ± 0.19 <sup>d</sup>   |
| Vitamin B <sub>12</sub> intake [µg] | 10.31 ± 0.12 <sup>a</sup> | 524.90 ± 6.33 <sup>b</sup> | 8.49 ± 0.10 <sup>a</sup> | 432.40 ± 8.55 <sup>c</sup> |
| Vitamin B <sub>6</sub> intake [mg]  | 6.19 ± 0.07 <sup>a</sup>  | 6.18 ± 0.07 <sup>a</sup>   | 5.09 ± 0.06 <sup>b</sup> | 5.09 ± 0.10 <sup>b</sup>   |

**Table S3:** Total nutrient and energy intake in the C, CMS, HF and HFMS group after the 12-weeks feeding experiment (DIO- and MDS-phase).

Data are presented as mean ± SEM (n = 8-9). Different superscript letters indicate statistical significance ( $p < 0.05$ ).



| <b>Table S4</b>    |                            |                            |                            |                            |
|--------------------|----------------------------|----------------------------|----------------------------|----------------------------|
| Metabolite<br>[μM] | C                          | CMS                        | HF                         | HFMS                       |
| 3MHis              | 3.58 ± 0.29 <sup>ac</sup>  | 3.51 ± 0.30 <sup>a</sup>   | 5.80 ± 0.49 <sup>b</sup>   | 4.86 ± 0.30 <sup>bc</sup>  |
| Aad                | 10.04 ± 0.49 <sup>a</sup>  | 8.93 ± 0.56 <sup>ab</sup>  | 7.30 ± 0.42 <sup>b</sup>   | 8.31 ± 0.40 <sup>ab</sup>  |
| Abu                | 8.12 ± 0.68                | 8.83 ± 0.84                | 6.46 ± 0.32                | 8.73 ± 0.55                |
| Ala                | 559.00 ± 27.16             | 641.11 ± 42.98             | 661.43 ± 45.84             | 765.22 ± 79.53             |
| Arg                | 93.22 ± 3.89               | 100.60 ± 6.93              | 87.10 ± 6.07               | 101.97 ± 6.20              |
| Asn                | 56.41 ± 2.38 <sup>a</sup>  | 68.93 ± 5.97 <sup>a</sup>  | 77.70 ± 4.76 <sup>ab</sup> | 92.31 ± 7.79 <sup>b</sup>  |
| Asp                | 9.61 ± 0.60                | 9.81 ± 1.03                | 7.88 ± 0.56                | 8.10 ± 0.50                |
| Cit                | 48.41 ± 2.88 <sup>a</sup>  | 50.18 ± 3.24 <sup>ac</sup> | 61.31 ± 3.36 <sup>bc</sup> | 63.01 ± 2.34 <sup>b</sup>  |
| Cys                | 15.99 ± 2.69               | 24.66 ± 2.63               | 21.24 ± 4.22               | 32.36 ± 6.26               |
| EtN                | 13.12 ± 0.70               | 13.47 ± 0.70               | 13.50 ± 0.85               | 12.27 ± 0.44               |
| Gln                | 707.44 ± 18.49             | 775.89 ± 18.63             | 793.86 ± 38.77             | 812.56 ± 27.98             |
| Glu                | 63.79 ± 4.66               | 61.28 ± 3.37               | 51.57 ± 3.56               | 61.19 ± 3.68               |
| Gly                | 233.56 ± 5.09 <sup>a</sup> | 169.56 ± 5.83 <sup>b</sup> | 218.43 ± 9.95 <sup>a</sup> | 174.67 ± 6.59 <sup>b</sup> |
| His                | 74.67 ± 2.54               | 71.24 ± 5.27               | 74.63 ± 2.33               | 85.48 ± 3.05               |
| Hyp                | 16.18 ± 0.70               | 16.17 ± 0.55               | 16.71 ± 0.91               | 16.01 ± 0.49               |
| Ile                | 138.00 ± 7.41              | 155.01 ± 16.82             | 130.57 ± 6.86              | 151.56 ± 9.03              |
| Leu                | 222.44 ± 11.95             | 249.00 ± 28.86             | 203.43 ± 11.61             | 234.22 ± 12.69             |
| Lys                | 329.11 ± 12.50             | 331.11 ± 36.25             | 349.00 ± 17.98             | 345.11 ± 30.40             |
| Met                | 48.60 ± 3.30               | 86.68 ± 19.73              | 53.10 ± 3.93               | 101.07 ± 11.58             |
| Orn                | 55.20 ± 3.79 <sup>a</sup>  | 52.04 ± 5.18 <sup>a</sup>  | 82.53 ± 7.09 <sup>b</sup>  | 69.70 ± 3.38 <sup>ab</sup> |
| PEtN               | 4.94 ± 0.63                | 6.67 ± 0.72                | 6.15 ± 0.91                | 6.88 ± 0.71                |
| Phe                | 71.97 ± 3.68               | 75.58 ± 5.65               | 69.04 ± 4.08               | 80.79 ± 3.57               |

**Table S4**  
**Continued**

|     | C                          | CMS                         | HF                           | HFMS                        |
|-----|----------------------------|-----------------------------|------------------------------|-----------------------------|
| Pro | 128.72 ± 10.92             | 157.10 ± 33.78              | 160.27 ± 15.85               | 191.23 ± 19.21              |
| Sar | 1.43 ± 0.15 <sup>a</sup>   | 13.34 ± 3.04 <sup>b</sup>   | 1.13 ± 0.09 <sup>a</sup>     | 8.03 ± 0.95 <sup>ab</sup>   |
| Ser | 143.22 ± 5.83 <sup>a</sup> | 203.56 ± 19.71 <sup>b</sup> | 182.71 ± 10.15 <sup>ab</sup> | 235.00 ± 15.39 <sup>b</sup> |
| Tau | 310.78 ± 20.69             | 370.67 ± 35.22              | 386.86 ± 34.04               | 425.11 ± 32.00              |
| Thr | 191.67 ± 11.45             | 197.56 ± 24.32              | 228.71 ± 13.00               | 232.33 ± 13.78              |
| Trp | 74.01 ± 4.15               | 86.22 ± 5.94                | 70.53 ± 3.40                 | 79.93 ± 3.20                |
| Tyr | 92.47 ± 4.79               | 106.26 ± 9.39               | 97.84 ± 7.32                 | 118.34 ± 7.00               |
| Val | 346.00 ± 17.98             | 342.11 ± 35.50              | 312.86 ± 13.21               | 345.67 ± 15.98              |

**Table S4:** Blood plasma metabolite levels of C, CMS, HF and HFMS mice after 4-weeks dietary MDS.

Data are presented as mean ± SEM (n=8-9). Different superscript letters indicate statistical significance ( $p < 0.05$ ). 3MHis, 3-methyl-L-histidine; Aad, L- $\alpha$ -aminoadipic acid; Abu, L- $\alpha$ -amino-n-butyrate; Ala, L-alanine; Arg, L-arginine; Asn, L-asparagine; Asp, L-asparic acid; Cit, L-citrulline; Cys, L-cystine; EtN, ethanolamine; Gln, L-glutamine; Glu, L-glutamate; Gly, glycine; His, L-histidine; Hyp, hydroxyproline; Ile, L-isoleucine; Leu, L-leucine; Lys, L-lysine; Met, L-methionine; Orn, L-ornithine; PEtN, O-phosphoethanolamine; Phe, L-phenylalanine; Pro, L-proline; Sar, sarcosine; Ser, L-serine; Tau, taurine; Thr, L-threonine; Trp, L-tryptophane; Tyr, L-tyrosine; Val, L-valine.

| <b>Table S5</b>                             |                                |                                |                               |                                |
|---------------------------------------------|--------------------------------|--------------------------------|-------------------------------|--------------------------------|
| Metabolite<br>[ $\mu\text{mol/g protein}$ ] | C                              | CMS                            | HF                            | HFMS                           |
| 1MHis                                       | 0.43 $\pm$ 0.03                | 0.41 $\pm$ 0.02                | 0.46 $\pm$ 0.02               | 0.45 $\pm$ 0.04                |
| Aad                                         | 1.15 $\pm$ 0.23                | 0.91 $\pm$ 0.19                | 0.56 $\pm$ 0.05               | 0.87 $\pm$ 0.13                |
| Abu                                         | 0.96 $\pm$ 0.12 <sup>a</sup>   | 0.97 $\pm$ 0.12 <sup>a</sup>   | 0.50 $\pm$ 0.04 <sup>b</sup>  | 0.74 $\pm$ 0.11 <sup>ab</sup>  |
| Ala                                         | 99.31 $\pm$ 5.10               | 106.94 $\pm$ 4.30              | 104.34 $\pm$ 5.76             | 101.60 $\pm$ 4.32              |
| Asn                                         | 4.65 $\pm$ 0.15 <sup>ab</sup>  | 4.96 $\pm$ 0.20 <sup>a</sup>   | 3.91 $\pm$ 0.17 <sup>b</sup>  | 4.43 $\pm$ 0.29 <sup>ab</sup>  |
| Asp                                         | 4.23 $\pm$ 0.27 <sup>a</sup>   | 5.86 $\pm$ 0.55 <sup>b</sup>   | 3.66 $\pm$ 0.11 <sup>a</sup>  | 5.12 $\pm$ 0.34 <sup>ab</sup>  |
| bAib                                        | 0.15 $\pm$ 0.01 <sup>a</sup>   | 0.14 $\pm$ 0.01 <sup>ac</sup>  | 0.08 $\pm$ 0.01 <sup>b</sup>  | 0.10 $\pm$ 0.01 <sup>bc</sup>  |
| bAla                                        | 1.22 $\pm$ 0.11 <sup>a</sup>   | 1.22 $\pm$ 0.07 <sup>a</sup>   | 1.19 $\pm$ 0.14 <sup>a</sup>  | 1.90 $\pm$ 0.22 <sup>b</sup>   |
| Cit                                         | 0.42 $\pm$ 0.04 <sup>a</sup>   | 0.24 $\pm$ 0.02 <sup>bd</sup>  | 0.36 $\pm$ 0.01 <sup>ac</sup> | 0.31 $\pm$ 0.02 <sup>cd</sup>  |
| EtN                                         | 0.55 $\pm$ 0.05 <sup>a</sup>   | 0.82 $\pm$ 0.07 <sup>b</sup>   | 0.49 $\pm$ 0.04 <sup>a</sup>  | 0.67 $\pm$ 0.05 <sup>ab</sup>  |
| GABA                                        | 0.52 $\pm$ 0.06                | 0.54 $\pm$ 0.04                | 0.44 $\pm$ 0.03               | 0.45 $\pm$ 0.03                |
| Gln                                         | 73.93 $\pm$ 4.62               | 88.54 $\pm$ 3.54               | 86.57 $\pm$ 4.35              | 85.77 $\pm$ 4.80               |
| Glu                                         | 28.89 $\pm$ 3.20               | 23.89 $\pm$ 1.56               | 27.96 $\pm$ 0.66              | 29.19 $\pm$ 2.05               |
| Gly                                         | 48.20 $\pm$ 2.19 <sup>a</sup>  | 29.49 $\pm$ 2.51 <sup>bc</sup> | 37.94 $\pm$ 1.14 <sup>b</sup> | 26.38 $\pm$ 2.53 <sup>c</sup>  |
| His                                         | 10.65 $\pm$ 0.59               | 10.66 $\pm$ 0.47               | 10.07 $\pm$ 0.40              | 10.61 $\pm$ 0.45               |
| Hyp                                         | 0.50 $\pm$ 0.03 <sup>a</sup>   | 0.44 $\pm$ 0.02 <sup>ac</sup>  | 0.38 $\pm$ 0.02 <sup>bc</sup> | 0.38 $\pm$ 0.02 <sup>bc</sup>  |
| Ile                                         | 6.55 $\pm$ 0.29 <sup>a</sup>   | 6.68 $\pm$ 0.36 <sup>a</sup>   | 5.08 $\pm$ 0.31 <sup>b</sup>  | 5.52 $\pm$ 0.37 <sup>ab</sup>  |
| Leu                                         | 11.63 $\pm$ 0.61 <sup>ab</sup> | 12.22 $\pm$ 0.61 <sup>a</sup>  | 9.22 $\pm$ 0.49 <sup>b</sup>  | 10.10 $\pm$ 0.64 <sup>ab</sup> |
| Lys                                         | 12.32 $\pm$ 0.48 <sup>ac</sup> | 13.94 $\pm$ 0.77 <sup>a</sup>  | 9.90 $\pm$ 0.39 <sup>b</sup>  | 11.06 $\pm$ 0.49 <sup>bc</sup> |
| Met                                         | 0.64 $\pm$ 0.05                | 0.70 $\pm$ 0.09                | 0.55 $\pm$ 0.03               | 0.73 $\pm$ 0.05                |
| Orn                                         | 6.18 $\pm$ 0.38 <sup>a</sup>   | 5.30 $\pm$ 0.29 <sup>ab</sup>  | 4.55 $\pm$ 0.21 <sup>b</sup>  | 4.28 $\pm$ 0.31 <sup>b</sup>   |
| PEtN                                        | 4.58 $\pm$ 0.37                | 4.77 $\pm$ 0.19                | 4.49 $\pm$ 0.13               | 4.68 $\pm$ 0.33                |

**Table S5**  
**Continued**

|     | C                           | CMS                        | HF                         | HFMS                       |
|-----|-----------------------------|----------------------------|----------------------------|----------------------------|
| Phe | 4.21 ± 0.15 <sup>ab</sup>   | 4.33 ± 0.19 <sup>a</sup>   | 3.52 ± 0.19 <sup>b</sup>   | 3.76 ± 0.22 <sup>ab</sup>  |
| Pro | 8.19 ± 0.63                 | 8.68 ± 0.90                | 6.50 ± 0.35                | 8.08 ± 0.55                |
| Sar | 1.76 ± 0.40 <sup>a</sup>    | 9.22 ± 1.89 <sup>b</sup>   | 0.75 ± 0.10 <sup>a</sup>   | 6.90 ± 0.52 <sup>b</sup>   |
| Ser | 7.53 ± 0.25 <sup>ac</sup>   | 8.78 ± 0.65 <sup>a</sup>   | 5.85 ± 0.28 <sup>bc</sup>  | 7.08 ± 0.30 <sup>bc</sup>  |
| Tau | 187.45 ± 6.09 <sup>ab</sup> | 174.97 ± 4.81 <sup>b</sup> | 208.79 ± 5.18 <sup>a</sup> | 202.04 ± 6.10 <sup>a</sup> |
| Thr | 7.78 ± 0.34 <sup>ac</sup>   | 9.09 ± 0.63 <sup>a</sup>   | 7.16 ± 0.32 <sup>bc</sup>  | 7.25 ± 0.37 <sup>bc</sup>  |
| Trp | 1.16 ± 0.04 <sup>a</sup>    | 1.26 ± 0.06 <sup>a</sup>   | 0.95 ± 0.04 <sup>b</sup>   | 1.08 ± 0.06 <sup>ab</sup>  |
| Tyr | 4.70 ± 0.14 <sup>ab</sup>   | 5.41 ± 0.25 <sup>a</sup>   | 4.08 ± 0.23 <sup>b</sup>   | 4.54 ± 0.19 <sup>b</sup>   |
| Val | 12.72 ± 0.51 <sup>a</sup>   | 12.47 ± 0.71 <sup>ac</sup> | 9.56 ± 0.52 <sup>b</sup>   | 10.20 ± 0.65 <sup>bc</sup> |

**Table S5:** Selected metabolite levels in C, CMS, HF and HFMS liver tissues after 4 weeks of dietary MDS.

Data are presented as mean ± SEM [ $\mu\text{mol/g}$  protein] (n=8-9). Different superscript letters indicate statistical significance ( $p < 0.05$ ). 1MHis, 1-methyl-L-histidine; Aad, L- $\alpha$ -amino adipic acid; Abu, L- $\alpha$ -amino-n-butyrate; Ala, L-alanine; Asn, L-asparagine; Asp, L-asparic acid; bAib, D,L- $\beta$ -aminoisobutyrate; bAla,  $\beta$ -alanine; Cit, L-citrulline; EtN, ethanolamine; GABA,  $\gamma$ -amino-n-butyrate; Gln, L-glutamine; Glu, L-glutamate; Gly, glycine; His, L-histidine; Hyp, hydroxyproline; Ile, L-isoleucine; Leu, L-leucine; Lys, L-lysine; Met, L-methionine; Orn, L-ornithine; PEtN, O-phosphoethanolamine; Phe, L-phenylalanine; Pro, L-proline; Sar, sarcosine; Ser, L-serine; Tau, taurine; Thr, L-threonine; Trp, L-tryptophane; Tyr, L-tyrosine; Val, L-valine.

**Table S6**

| Metabolite<br>[ $\mu\text{mol}/\text{mg}$ tissue] | C                      | CMS                    | HF                     | HFMS                   |
|---------------------------------------------------|------------------------|------------------------|------------------------|------------------------|
| C0                                                | $57.561 \pm 2.219^a$   | $42.271 \pm 1.819^b$   | $63.116 \pm 2.457^a$   | $47.757 \pm 2.405^b$   |
| C10                                               | $0.318 \pm 0.017^a$    | $0.294 \pm 0.010^a$    | $0.347 \pm 0.014^{ab}$ | $0.385 \pm 0.012^b$    |
| C10:1                                             | $0.095 \pm 0.004^a$    | $0.093 \pm 0.004^a$    | $0.164 \pm 0.005^b$    | $0.162 \pm 0.005^b$    |
| C10:2                                             | $0.079 \pm 0.005$      | $0.082 \pm 0.004$      | $0.084 \pm 0.002$      | $0.085 \pm 0.003$      |
| C12                                               | $0.062 \pm 0.004^a$    | $0.052 \pm 0.002^{ab}$ | $0.046 \pm 0.001^b$    | $0.048 \pm 0.001^b$    |
| C12-DC                                            | $0.159 \pm 0.010$      | $0.149 \pm 0.008$      | $0.128 \pm 0.004$      | $0.154 \pm 0.007$      |
| C12:1                                             | $0.177 \pm 0.013^a$    | $0.240 \pm 0.011^b$    | $0.183 \pm 0.011^a$    | $0.202 \pm 0.007^{ab}$ |
| C14                                               | $0.135 \pm 0.008^a$    | $0.114 \pm 0.005^{ab}$ | $0.117 \pm 0.003^{ab}$ | $0.099 \pm 0.004^a$    |
| C14:1                                             | $0.051 \pm 0.003$      | $0.048 \pm 0.002$      | $0.054 \pm 0.003$      | $0.049 \pm 0.002$      |
| C14:1-OH                                          | $0.040 \pm 0.003^{ab}$ | $0.034 \pm 0.003^a$    | $0.046 \pm 0.001^b$    | $0.045 \pm 0.002^b$    |
| C14:2                                             | $0.025 \pm 0.002$      | $0.021 \pm 0.001$      | $0.022 \pm 0.001$      | $0.023 \pm 0.001$      |
| C14:2-OH                                          | $0.041 \pm 0.003$      | $0.038 \pm 0.001$      | $0.039 \pm 0.001$      | $0.040 \pm 0.002$      |
| C16                                               | $0.614 \pm 0.050^{ac}$ | $0.438 \pm 0.036^b$    | $0.726 \pm 0.040^a$    | $0.545 \pm 0.037^{bc}$ |
| C16-OH                                            | $0.039 \pm 0.003^a$    | $0.036 \pm 0.002^{ab}$ | $0.032 \pm 0.002^{ab}$ | $0.029 \pm 0.001^b$    |
| C16:1                                             | $0.164 \pm 0.011^a$    | $0.125 \pm 0.010^{ab}$ | $0.164 \pm 0.013^a$    | $0.120 \pm 0.007^b$    |
| C16:1-OH                                          | $0.037 \pm 0.002^a$    | $0.029 \pm 0.001^a$    | $0.082 \pm 0.004^b$    | $0.071 \pm 0.004^b$    |
| C16:2                                             | $0.019 \pm 0.001$      | $0.018 \pm 0.001$      | $0.018 \pm 0.001$      | $0.016 \pm 0.001$      |
| C16:2-OH                                          | $0.024 \pm 0.002^a$    | $0.017 \pm 0.001^b$    | $0.038 \pm 0.001^c$    | $0.033 \pm 0.002^c$    |
| C18                                               | $0.322 \pm 0.029^a$    | $0.197 \pm 0.008^b$    | $0.561 \pm 0.030^c$    | $0.441 \pm 0.027^d$    |
| C18:1                                             | $0.756 \pm 0.061^a$    | $0.469 \pm 0.050^a$    | $1.217 \pm 0.097^b$    | $0.913 \pm 0.092^b$    |
| C18:1-OH                                          | $0.055 \pm 0.004^a$    | $0.046 \pm 0.002^a$    | $0.074 \pm 0.003^b$    | $0.060 \pm 0.002^{ac}$ |
| C18:2                                             | $0.174 \pm 0.013^a$    | $0.122 \pm 0.006^b$    | $0.143 \pm 0.005^{ab}$ | $0.119 \pm 0.006^b$    |

**Table S6**  
**Continued**

|                 | C                           | CMS                         | HF                          | HFMS                        |
|-----------------|-----------------------------|-----------------------------|-----------------------------|-----------------------------|
| C2              | 18.413 ± 0.858 <sup>a</sup> | 12.340 ± 0.474 <sup>b</sup> | 14.566 ± 0.841 <sup>b</sup> | 10.685 ± 0.827 <sup>c</sup> |
| C3              | 4.772 ± 0.362 <sup>a</sup>  | 3.363 ± 0.302 <sup>b</sup>  | 5.396 ± 0.264 <sup>a</sup>  | 4.129 ± 0.272 <sup>b</sup>  |
| C3-DC (C4-OH)   | 0.907 ± 0.062 <sup>ab</sup> | 0.759 ± 0.053 <sup>bc</sup> | 1.042 ± 0.045 <sup>a</sup>  | 0.666 ± 0.052 <sup>c</sup>  |
| C3-OH           | 0.049 ± 0.003 <sup>a</sup>  | 0.050 ± 0.003 <sup>a</sup>  | 0.037 ± 0.002 <sup>b</sup>  | 0.044 ± 0.002 <sup>ab</sup> |
| C3:1            | 0.017 ± 0.001               | 0.016 ± 0.001               | 0.014 ± 0.0005              | 0.016 ± 0.001               |
| C4              | 2.344 ± 0.100 <sup>a</sup>  | 1.238 ± 0.088 <sup>b</sup>  | 1.773 ± 0.105 <sup>c</sup>  | 1.078 ± 0.088 <sup>d</sup>  |
| C4:1            | 0.198 ± 0.011 <sup>a</sup>  | 0.196 ± 0.008 <sup>a</sup>  | 0.160 ± 0.005 <sup>b</sup>  | 0.174 ± 0.006 <sup>ab</sup> |
| C5              | 1.179 ± 0.064 <sup>a</sup>  | 0.733 ± 0.080 <sup>b</sup>  | 1.453 ± 0.095 <sup>a</sup>  | 1.033 ± 0.089 <sup>b</sup>  |
| C5-DC (C6-OH)   | 0.281 ± 0.012 <sup>a</sup>  | 0.207 ± 0.009 <sup>b</sup>  | 0.557 ± 0.021 <sup>c</sup>  | 0.482 ± 0.023 <sup>d</sup>  |
| C5-M-DC         | 0.188 ± 0.018 <sup>a</sup>  | 0.112 ± 0.006 <sup>b</sup>  | 0.264 ± 0.021 <sup>c</sup>  | 0.181 ± 0.010 <sup>a</sup>  |
| C5-OH (C3-DC-M) | 0.426 ± 0.013 <sup>a</sup>  | 0.362 ± 0.013 <sup>b</sup>  | 0.464 ± 0.014 <sup>a</sup>  | 0.350 ± 0.015 <sup>b</sup>  |
| C5:1            | 0.044 ± 0.004               | 0.039 ± 0.003               | 0.033 ± 0.001               | 0.036 ± 0.001               |
| C5:1-DC         | 0.164 ± 0.010 <sup>a</sup>  | 0.119 ± 0.010 <sup>b</sup>  | 0.156 ± 0.010 <sup>ab</sup> | 0.129 ± 0.011 <sup>ab</sup> |
| C6 (C4:1-DC)    | 0.749 ± 0.041 <sup>a</sup>  | 0.399 ± 0.028 <sup>bc</sup> | 0.497 ± 0.028 <sup>b</sup>  | 0.341 ± 0.030 <sup>c</sup>  |
| C6:1            | 0.047 ± 0.004               | 0.043 ± 0.003               | 0.037 ± 0.002               | 0.042 ± 0.002               |
| C7-DC           | 0.255 ± 0.027 <sup>a</sup>  | 0.354 ± 0.043 <sup>ab</sup> | 0.459 ± 0.085 <sup>b</sup>  | 0.519 ± 0.025 <sup>b</sup>  |
| C8              | 0.276 ± 0.014 <sup>a</sup>  | 0.217 ± 0.009 <sup>a</sup>  | 0.973 ± 0.047 <sup>b</sup>  | 0.862 ± 0.050 <sup>b</sup>  |
| C9              | 0.094 ± 0.005 <sup>a</sup>  | 0.091 ± 0.007 <sup>a</sup>  | 0.279 ± 0.015 <sup>b</sup>  | 0.277 ± 0.015 <sup>b</sup>  |

**Table S6:** Concentrations of selected hepatic carnitines and acyl-carnitines in C, CMS, HF and HFMS liver tissue after 4 weeks of dietary MDS.

Data are presented as mean ± SEM (n=8-9). Different superscript letters indicate statistical significance ( $p < 0.05$ ). C0, DL-carnitine; C10, decanoyl-L-carnitine; C10:1 decenoyl-L-carnitine; C10:2, decadienyl-L-carnitine; C12, dodecanoyl-L-carnitine; C12-DC, dodecanedioyl-L-carnitine; C12:1, dodecenoyl-L-carnitine; C14, tetradecanoyl-L-carnitine; C14:1, tetradecenoyl-L-carnitine; C14:1-OH, hydroxytetradecenoyl-L-carnitine; C14:2, tetradecadienyl-L-carnitine; C14:2-OH, hydroxy-

tetradecadienyl-L-carnitine; C16, hexadecanoyl-L-carnitine; C16-OH, hydroxyhexadecanoyl-L-carnitine; C16:1, hexadecenoyl-L-carnitine; C16:1-OH, hydroxyhexadecenoyl-L-carnitine; C16:2, hexadecadienyl-L-carnitine; C16:2-OH, hydroxyhexadecadienyl-L-carnitine; C18, octadecanoyl-L-carnitine; C18:1, octadecenoyl-L-carnitine; C18:1-OH, hydroxyoctadecenoyl-L-carnitine; C18:2, octadecadienyl-L-carnitine; C2, acetyl-L-carnitine; C3, propionyl-L-carnitine; C3-DC / C4-OH, malonyl-L-carnitine / hydroxybutyryl-L-carnitine; C3-OH, hydroxypropionyl-L-carnitine; C3:1, propenyl-L-carnitine; C4, butyryl-L-carnitine; C4:1, butenyl-L-carnitine; C5, valeryl-L-carnitine; C5-DC / C6-OH, glutaryl-L-carnitine / hydroxyhexanoyl-L-carnitine; C5-M-DC, methylglutaryl-L-carnitine; C5-OH / C3-DC-M, methylmalonyl-L-carnitine / hydroxyvaleryl-L-carnitine; C5:1, tiglyl-L-carnitine; C5:1-DC, glutaconyl-L-carnitine; C6 / C4:1-DC, fumaryl-L-carnitine / hexanoyl-L-carnitine; C6:1, hexenoyl-L-carnitine; C7-DC, pimelyl-L-carnitine; C8, octanoyl-L-carnitine; C9, nonayl-L-carnitine.

**Table S7**

| Metabolite<br>[ $\mu\text{mol}/\text{mg}$ tissue] | C                                    | CMS                                  | HF                                   | HFMS                                |
|---------------------------------------------------|--------------------------------------|--------------------------------------|--------------------------------------|-------------------------------------|
| PC aa C24:0                                       | 1.37 $\pm$ 0.18                      | 1.13 $\pm$ 0.18                      | 1.39 $\pm$ 0.23                      | 1.66 $\pm$ 0.27                     |
| PC aa C26:0                                       | 4.59 $\pm$ 0.89                      | 4.66 $\pm$ 0.93                      | 3.05 $\pm$ 0.63                      | 3.92 $\pm$ 0.72                     |
| PC aa C28:1                                       | 1.50 $\pm$ 0.22                      | 1.37 $\pm$ 0.19                      | 1.29 $\pm$ 0.19                      | 1.48 $\pm$ 0.21                     |
| <b>PC aa C30:0</b>                                | <b>5.63 <math>\pm</math> 0.26</b>    | <b>5.42 <math>\pm</math> 0.17</b>    | <b>4.49 <math>\pm</math> 0.21</b>    | <b>4.51 <math>\pm</math> 0.14</b>   |
| PC aa C30:2                                       | 0.73 $\pm$ 0.11                      | 0.60 $\pm$ 0.09                      | 0.66 $\pm$ 0.11                      | 0.78 $\pm$ 0.13                     |
| <b>PC aa C32:0</b>                                | <b>233.42 <math>\pm</math> 8.66</b>  | <b>190.71 <math>\pm</math> 4.84</b>  | <b>153.70 <math>\pm</math> 9.36</b>  | <b>147.61 <math>\pm</math> 5.48</b> |
| <b>PC aa C32:1</b>                                | <b>320.77 <math>\pm</math> 21.63</b> | <b>380.67 <math>\pm</math> 19.39</b> | <b>199.79 <math>\pm</math> 9.73</b>  | <b>189.49 <math>\pm</math> 5.64</b> |
| <b>PC aa C32:2</b>                                | <b>55.15 <math>\pm</math> 2.86</b>   | <b>67.79 <math>\pm</math> 2.95</b>   | <b>32.43 <math>\pm</math> 1.58</b>   | <b>32.10 <math>\pm</math> 1.41</b>  |
| PC aa C32:3                                       | 3.02 $\pm$ 0.20                      | 3.04 $\pm$ 0.14                      | 2.83 $\pm$ 0.20                      | 3.03 $\pm$ 0.23                     |
| PC aa C34:1                                       | 964.50 $\pm$ 49.03                   | 910.28 $\pm$ 50.06                   | 860.80 $\pm$ 27.16                   | 988.33 $\pm$ 32.59                  |
| PC aa C34:2                                       | 797.29 $\pm$ 64.95                   | 635.77 $\pm$ 50.09                   | 956.22 $\pm$ 30.77                   | 1064.57 $\pm$ 34.27                 |
| <b>PC aa C34:3</b>                                | <b>362.64 <math>\pm</math> 17.52</b> | <b>435.95 <math>\pm</math> 9.22</b>  | <b>212.16 <math>\pm</math> 12.82</b> | <b>223.95 <math>\pm</math> 9.71</b> |
| <b>PC aa C34:4</b>                                | <b>28.90 <math>\pm</math> 1.25</b>   | <b>30.69 <math>\pm</math> 0.70</b>   | <b>24.59 <math>\pm</math> 1.34</b>   | <b>25.10 <math>\pm</math> 0.87</b>  |
| PC aa C36:0                                       | 5.62 $\pm$ 0.33                      | 5.22 $\pm$ 0.11                      | 5.76 $\pm$ 0.54                      | 4.91 $\pm$ 0.40                     |
| <b>PC aa C36:1</b>                                | <b>295.24 <math>\pm</math> 10.44</b> | <b>272.08 <math>\pm</math> 6.31</b>  | <b>396.85 <math>\pm</math> 30.12</b> | <b>378.45 <math>\pm</math> 8.96</b> |
| PC aa C36:2                                       | 925.51 $\pm$ 34.44                   | 882.21 $\pm$ 22.38                   | 898.01 $\pm$ 34.67                   | 965.12 $\pm$ 27.20                  |
| PC aa C36:3                                       | 788.50 $\pm$ 27.92                   | 743.42 $\pm$ 16.48                   | 850.98 $\pm$ 35.66                   | 847.81 $\pm$ 21.22                  |
| PC aa C36:4                                       | 1023.12 $\pm$ 58.64                  | 1027.93 $\pm$ 43.71                  | 894.67 $\pm$ 36.13                   | 1033.56 $\pm$ 44.18                 |
| <b>PC aa C36:5</b>                                | <b>223.16 <math>\pm</math> 9.62</b>  | <b>229.99 <math>\pm</math> 7.53</b>  | <b>184.63 <math>\pm</math> 10.08</b> | <b>188.63 <math>\pm</math> 6.34</b> |
| PC aa C36:6                                       | 16.68 $\pm$ 0.92                     | 15.93 $\pm$ 0.67                     | 17.57 $\pm$ 0.95                     | 17.80 $\pm$ 0.53                    |
| <b>PC aa C38:0</b>                                | <b>7.35 <math>\pm</math> 0.26</b>    | <b>5.88 <math>\pm</math> 0.20</b>    | <b>12.14 <math>\pm</math> 0.82</b>   | <b>12.12 <math>\pm</math> 0.47</b>  |
| <b>PC aa C38:1</b>                                | <b>4.51 <math>\pm</math> 0.35</b>    | <b>3.13 <math>\pm</math> 0.26</b>    | <b>5.99 <math>\pm</math> 0.56</b>    | <b>5.75 <math>\pm</math> 0.22</b>   |



**Table S7**  
**Continued**

|                    | C                     | CMS                   | HF                    | HFMS                   |
|--------------------|-----------------------|-----------------------|-----------------------|------------------------|
| <b>PC aa C38:3</b> | <b>233.14 ± 10.07</b> | <b>187.56 ± 7.92</b>  | <b>396.63 ± 31.58</b> | <b>366.04 ± 12.92</b>  |
| <b>PC aa C38:4</b> | <b>765.00 ± 22.69</b> | <b>673.51 ± 22.98</b> | <b>922.61 ± 33.06</b> | <b>1000.79 ± 28.57</b> |
| <b>PC aa C38:5</b> | <b>475.33 ± 21.48</b> | <b>412.81 ± 18.17</b> | <b>614.90 ± 36.32</b> | <b>617.23 ± 19.10</b>  |
| PC aa C38:6        | 1003.86 ± 41.77       | 892.95 ± 23.28        | 995.63 ± 39.83        | 1067.03 ± 26.24        |
| PC aa C40:1        | 1.53 ± 0.05           | 1.29 ± 0.04           | 1.68 ± 0.10           | 1.68 ± 0.12            |
| PC aa C40:2        | 2.76 ± 0.06           | 2.23 ± 0.05           | 2.49 ± 0.18           | 2.56 ± 0.16            |
| <b>PC aa C40:3</b> | <b>4.74 ± 0.16</b>    | <b>3.81 ± 0.09</b>    | <b>4.29 ± 0.29</b>    | <b>3.97 ± 0.20</b>     |
| PC aa C40:4        | 24.01 ± 0.70          | 18.56 ± 0.47          | 25.23 ± 1.94          | 24.15 ± 0.83           |
| PC aa C40:5        | 42.92 ± 1.70          | 33.73 ± 1.46          | 55.00 ± 4.73          | 48.44 ± 1.98           |
| <b>PC aa C40:6</b> | <b>300.01 ± 8.28</b>  | <b>241.98 ± 10.32</b> | <b>369.29 ± 26.56</b> | <b>383.30 ± 8.89</b>   |
| PC aa C42:0        | 1.36 ± 0.05           | 1.29 ± 0.04           | 1.37 ± 0.09           | 1.47 ± 0.09            |
| PC aa C42:1        | 1.25 ± 0.04           | 1.00 ± 0.06           | 1.20 ± 0.09           | 1.19 ± 0.07            |
| PC aa C42:2        | 1.24 ± 0.04           | 1.01 ± 0.03           | 1.08 ± 0.07           | 1.27 ± 0.11            |
| PC aa C42:4        | 1.38 ± 0.04           | 1.13 ± 0.03           | 1.27 ± 0.10           | 1.24 ± 0.07            |
| <b>PC aa C42:5</b> | <b>2.11 ± 0.05</b>    | <b>1.69 ± 0.05</b>    | <b>1.71 ± 0.11</b>    | <b>1.72 ± 0.10</b>     |
| <b>PC aa C42:6</b> | <b>7.20 ± 0.23</b>    | <b>5.36 ± 0.15</b>    | <b>5.22 ± 0.44</b>    | <b>5.23 ± 0.31</b>     |
| PC ae C30:0        | 0.50 ± 0.03           | 0.45 ± 0.02           | 0.50 ± 0.03           | 0.56 ± 0.05            |
| PC ae C30:1        | 1.30 ± 0.30           | 1.21 ± 0.26           | 0.74 ± 0.16           | 0.92 ± 0.18            |
| PC ae C30:2        | 0.46 ± 0.07           | 0.40 ± 0.06           | 0.41 ± 0.06           | 0.49 ± 0.07            |
| PC ae C32:1        | 6.93 ± 0.39           | 6.44 ± 0.24           | 6.43 ± 0.47           | 6.76 ± 0.50            |
| PC ae C32:2        | 2.13 ± 0.27           | 1.71 ± 0.22           | 1.78 ± 0.25           | 2.09 ± 0.28            |
| <b>PC ae C34:0</b> | <b>6.14 ± 0.22</b>    | <b>5.24 ± 0.11</b>    | <b>18.21 ± 1.40</b>   | <b>17.64 ± 0.67</b>    |
| <b>PC ae C34:1</b> | <b>40.67 ± 1.55</b>   | <b>41.59 ± 1.16</b>   | <b>79.25 ± 4.93</b>   | <b>78.06 ± 2.57</b>    |

**Table S7**  
**Continued**

|                    | C                   | CMS                 | HF                   | HFMS                 |
|--------------------|---------------------|---------------------|----------------------|----------------------|
| <b>PC ae C34:2</b> | <b>18.06 ± 1.00</b> | <b>20.63 ± 0.66</b> | <b>24.73 ± 1.77</b>  | <b>26.91 ± 1.22</b>  |
| PC ae C34:3        | 3.43 ± 0.28         | 3.32 ± 0.19         | 3.03 ± 0.30          | 3.42 ± 0.36          |
| <b>PC ae C36:0</b> | <b>2.97 ± 0.23</b>  | <b>3.04 ± 0.10</b>  | <b>4.01 ± 0.23</b>   | <b>4.10 ± 0.23</b>   |
| <b>PC ae C36:1</b> | <b>28.02 ± 1.24</b> | <b>30.19 ± 0.55</b> | <b>76.90 ± 5.91</b>  | <b>75.38 ± 1.88</b>  |
| <b>PC ae C36:2</b> | <b>39.69 ± 1.63</b> | <b>42.06 ± 1.15</b> | <b>104.48 ± 7.32</b> | <b>106.82 ± 3.13</b> |
| <b>PC ae C36:3</b> | <b>15.12 ± 0.59</b> | <b>16.84 ± 0.34</b> | <b>26.88 ± 1.66</b>  | <b>26.56 ± 0.93</b>  |
| <b>PC ae C36:4</b> | <b>21.54 ± 0.89</b> | <b>18.99 ± 0.58</b> | <b>28.81 ± 1.89</b>  | <b>29.67 ± 1.54</b>  |
| PC ae C36:5        | 7.24 ± 0.23         | 6.55 ± 0.13         | 6.99 ± 0.49          | 6.60 ± 0.31          |
| PC ae C38:0        | 78.14 ± 5.22        | 71.24 ± 3.93        | 74.28 ± 4.79         | 74.44 ± 3.24         |
| <b>PC ae C38:1</b> | <b>7.19 ± 0.26</b>  | <b>6.18 ± 0.17</b>  | <b>13.85 ± 0.85</b>  | <b>12.97 ± 0.46</b>  |
| <b>PC ae C38:2</b> | <b>16.30 ± 0.59</b> | <b>15.25 ± 0.50</b> | <b>32.31 ± 2.49</b>  | <b>29.76 ± 1.35</b>  |
| <b>PC ae C38:3</b> | <b>15.69 ± 0.44</b> | <b>13.89 ± 0.50</b> | <b>40.75 ± 2.66</b>  | <b>38.81 ± 1.19</b>  |
| <b>PC ae C38:4</b> | <b>31.11 ± 0.91</b> | <b>28.31 ± 1.26</b> | <b>115.84 ± 8.61</b> | <b>118.50 ± 3.77</b> |
| <b>PC ae C38:5</b> | <b>25.44 ± 0.90</b> | <b>22.29 ± 0.63</b> | <b>38.46 ± 2.51</b>  | <b>38.22 ± 1.63</b>  |
| <b>PC ae C38:6</b> | <b>11.70 ± 0.38</b> | <b>10.34 ± 0.32</b> | <b>16.96 ± 1.26</b>  | <b>17.66 ± 0.77</b>  |
| <b>PC ae C40:1</b> | <b>61.06 ± 4.11</b> | <b>42.70 ± 2.39</b> | <b>49.49 ± 3.38</b>  | <b>45.95 ± 2.01</b>  |
| PC ae C40:2        | 7.03 ± 0.34         | 6.00 ± 0.27         | 6.96 ± 0.49          | 6.67 ± 0.32          |
| <b>PC ae C40:3</b> | <b>6.26 ± 0.17</b>  | <b>5.60 ± 0.13</b>  | <b>11.47 ± 0.68</b>  | <b>10.46 ± 0.37</b>  |
| <b>PC ae C40:4</b> | <b>12.01 ± 0.32</b> | <b>10.86 ± 0.48</b> | <b>31.02 ± 2.37</b>  | <b>28.56 ± 1.19</b>  |
| <b>PC ae C40:5</b> | <b>9.96 ± 0.36</b>  | <b>7.67 ± 0.27</b>  | <b>15.05 ± 0.93</b>  | <b>14.38 ± 0.68</b>  |
| <b>PC ae C40:6</b> | <b>14.49 ± 0.54</b> | <b>11.83 ± 0.58</b> | <b>51.51 ± 4.03</b>  | <b>53.17 ± 1.36</b>  |
| <b>PC ae C42:0</b> | <b>6.14 ± 0.32</b>  | <b>4.86 ± 0.23</b>  | <b>4.95 ± 0.32</b>   | <b>4.78 ± 0.28</b>   |
| PC ae C42:1        | 5.54 ± 0.40         | 4.22 ± 0.38         | 4.93 ± 0.55          | 5.41 ± 0.60          |

**Table S7**  
**Continued**

|                       | C                    | CMS                  | HF                   | HFMS                 |
|-----------------------|----------------------|----------------------|----------------------|----------------------|
| <b>PC ae C42:2</b>    | <b>5.37 ± 0.36</b>   | <b>3.46 ± 0.26</b>   | <b>4.86 ± 0.37</b>   | <b>4.41 ± 0.36</b>   |
| <b>PC ae C42:3</b>    | <b>19.21 ± 1.32</b>  | <b>10.71 ± 0.75</b>  | <b>13.83 ± 1.16</b>  | <b>12.82 ± 0.87</b>  |
| <b>PC ae C42:4</b>    | <b>2.42 ± 0.08</b>   | <b>1.89 ± 0.09</b>   | <b>2.60 ± 0.18</b>   | <b>2.64 ± 0.11</b>   |
| <b>PC ae C42:5</b>    | <b>3.02 ± 0.09</b>   | <b>2.46 ± 0.07</b>   | <b>3.99 ± 0.25</b>   | <b>3.72 ± 0.15</b>   |
| PC ae C44:3           | 1.46 ± 0.13          | 1.21 ± 0.11          | 1.29 ± 0.15          | 1.54 ± 0.19          |
| PC ae C44:4           | 1.11 ± 0.11          | 0.83 ± 0.10          | 0.97 ± 0.11          | 1.08 ± 0.15          |
| PC ae C44:5           | 1.93 ± 0.12          | 1.39 ± 0.10          | 1.52 ± 0.12          | 1.61 ± 0.14          |
| PC ae C44:6           | 1.32 ± 0.04          | 1.49 ± 0.09          | 1.49 ± 0.09          | 1.61 ± 0.07          |
| lysoPC a C14:0        | 3.64 ± 0.21          | 3.33 ± 0.17          | 2.98 ± 0.10          | 3.42 ± 0.13          |
| <b>lysoPC a C16:0</b> | <b>113.28 ± 5.33</b> | <b>120.38 ± 2.40</b> | <b>102.26 ± 2.63</b> | <b>101.40 ± 4.01</b> |
| <b>lysoPC a C16:1</b> | <b>5.74 ± 0.42</b>   | <b>6.67 ± 0.18</b>   | <b>4.51 ± 0.18</b>   | <b>4.20 ± 0.25</b>   |
| <b>lysoPC a C17:0</b> | <b>1.43 ± 0.05</b>   | <b>1.44 ± 0.05</b>   | <b>4.54 ± 0.16</b>   | <b>4.63 ± 0.14</b>   |
| <b>lysoPC a C18:0</b> | <b>59.88 ± 1.95</b>  | <b>54.78 ± 1.23</b>  | <b>71.60 ± 1.76</b>  | <b>73.72 ± 2.12</b>  |
| lysoPC a C18:1        | 33.29 ± 2.49         | 32.95 ± 1.15         | 37.93 ± 1.03         | 34.63 ± 1.27         |
| <b>lysoPC a C18:2</b> | <b>39.65 ± 2.20</b>  | <b>37.73 ± 1.03</b>  | <b>29.50 ± 1.14</b>  | <b>27.36 ± 0.85</b>  |
| lysoPC a C20:3        | 5.95 ± 0.50          | 4.71 ± 0.18          | 7.41 ± 0.38          | 6.33 ± 0.29          |
| lysoPC a C20:4        | 26.12 ± 1.95         | 22.23 ± 0.86         | 29.05 ± 1.24         | 27.89 ± 1.31         |
| lysoPC a C24:0        | 1.53 ± 0.15          | 1.30 ± 0.14          | 1.37 ± 0.18          | 1.71 ± 0.23          |
| lysoPC a C26:0        | 1.62 ± 0.19          | 1.44 ± 0.19          | 1.59 ± 0.23          | 2.01 ± 0.29          |
| lysoPC a C26:1        | 4.01 ± 0.46          | 3.50 ± 0.36          | 3.27 ± 0.44          | 4.07 ± 0.46          |
| lysoPC a C28:0        | 0.97 ± 0.10          | 0.85 ± 0.10          | 1.16 ± 0.16          | 1.38 ± 0.19          |
| lysoPC a C28:1        | 1.86 ± 0.29          | 1.58 ± 0.25          | 1.69 ± 0.35          | 2.12 ± 0.38          |

**Table S7**  
**Continued**

|                      | C                   | CMS                 | HF                  | HFMS                |
|----------------------|---------------------|---------------------|---------------------|---------------------|
| SM (OH) C14:1        | 1.44 ± 0.08         | 1.45 ± 0.06         | 1.83 ± 0.11         | 1.77 ± 0.07         |
| <b>SM (OH) C16:1</b> | <b>0.38 ± 0.02</b>  | <b>0.37 ± 0.01</b>  | <b>1.52 ± 0.09</b>  | <b>1.63 ± 0.07</b>  |
| SM (OH) C22:1        | 6.14 ± 0.32         | 6.41 ± 0.27         | 8.39 ± 1.03         | 8.31 ± 0.50         |
| SM (OH) C22:2        | 1.41 ± 0.09         | 1.58 ± 0.07         | 1.69 ± 0.19         | 1.62 ± 0.11         |
| <b>SM (OH) C24:1</b> | <b>2.18 ± 0.13</b>  | <b>1.58 ± 0.09</b>  | <b>1.90 ± 0.16</b>  | <b>1.87 ± 0.10</b>  |
| SM C16:0             | 35.92 ± 1.35        | 37.16 ± 1.21        | 40.11 ± 2.07        | 41.25 ± 1.38        |
| SM C16:1             | 1.68 ± 0.11         | 1.67 ± 0.09         | 1.67 ± 0.11         | 1.78 ± 0.11         |
| <b>SM C18:0</b>      | <b>4.10 ± 0.15</b>  | <b>3.83 ± 0.11</b>  | <b>10.05 ± 0.77</b> | <b>10.64 ± 0.42</b> |
| <b>SM C18:1</b>      | <b>0.38 ± 0.02</b>  | <b>0.36 ± 0.01</b>  | <b>0.86 ± 0.06</b>  | <b>0.93 ± 0.03</b>  |
| SM C20:2             | 0.20 ± 0.03         | 0.28 ± 0.02         | 0.02 ± 0.01         | 0.04 ± 0.01         |
| SM C22:3             | 2.74 ± 0.15         | 2.30 ± 0.25         | 3.07 ± 0.26         | 2.88 ± 0.20         |
| <b>SM C24:0</b>      | <b>18.86 ± 0.53</b> | <b>19.64 ± 0.60</b> | <b>13.53 ± 1.37</b> | <b>13.56 ± 0.74</b> |
| <b>SM C24:1</b>      | <b>9.76 ± 0.73</b>  | <b>15.12 ± 0.95</b> | <b>2.21 ± 0.64</b>  | <b>2.66 ± 0.66</b>  |
| SM C26:0             | 0.05 ± 0.01         | 0.06 ± 0.01         | 0.06 ± 0.01         | 0.06 ± 0.01         |
| SM C26:1             | 0.13 ± 0.01         | 0.11 ± 0.01         | 0.15 ± 0.01         | 0.15 ± 0.02         |

**Table S7:** PC, lyso-PC, hydroxyl- and sphingomyelin metabolite concentrations in C, CMS, HF and HFMS livers after 4 weeks of dietary MDS.

Data are presented as mean ± SEM (n=8-9). Bold numbers indicate statistical significance ( $p < 0.01$ ). PC aa, phosphatidylcholine diacyl; PC ae, phosphatidylcholine acyl-alkyl; SM (OH), hydroxysphingomyeline; SM, sphingomyeline.
